# Supplementary material for: Genome-Wide Identification of NAC Gene Family and Expression Analysis under Abiotic Stresses in Avena sativa
Source: Genes (Basel). 2023 May 29;14(6):1186. doi: 10.3390/genes14061186 (PMC10298501; doi:10.3390/genes14061186)
Supplement: Supplementary file 1 [file genes-14-01186-s001.zip › Table S1.xlsx]

## Sheet: Sheet1
Table S1 List of NAC genes information identified in A. sativa
Gene name	Gene ID	Gene locus	gene start	gene end	pl	molecular weight(Da)	length
AsNAC1	AVESA.00001b.r1.1Ag0000955.1	chr1A	14806656	14814620	6.6	32721.4	293
AsNAC2	AVESA.00001b.r1.1Ag0000119.1	chr1A	276351184	276353438	5.85	37594.4	343
AsNAC3	AVESA.00001b.r1.1Ag0001048.1	chr1A	286356096	286360027	4.42	45838.2	409
AsNAC4	AVESA.00001b.r1.1Ag0001072.1	chr1A	288995308	288997442	8.47	33250.7	304
AsNAC5	AVESA.00001b.r1.1Ag0003525.1	chr1A	527043033	527044765	8.35	42213.7	380
AsNAC6	AVESA.00001b.r1.1Cg0000553.1	chr1C	53968875	53974443	6.22	39137.8	346
AsNAC7	AVESA.00001b.r1.1Cg0001628.1	chr1C	420158458	420160376	5.93	37353.2	340
AsNAC8	AVESA.00001b.r1.1Cg0001630.1	chr1C	420396693	420398738	7.64	33657.2	304
AsNAC9	AVESA.00001b.r1.1Cg0001772.1	chr1C	442724211	442728068	4.43	46629.2	418
AsNAC10	AVESA.00001b.r1.1Cg0001785.1	chr1C	446926226	446928417	8.83	33280.8	304
AsNAC11	AVESA.00001b.r1.1Cg0001798.1	chr1C	449304297	449306752	6.22	42156.3	388
AsNAC12	AVESA.00001b.r1.1Dg0000102.1	chr1D	10778085	10779602	6.34	35204.1	315
AsNAC13	AVESA.00001b.r1.1Dg0000104.1	chr1D	11966783	11976840	9.12	56129.3	507
AsNAC14	AVESA.00001b.r1.1Dg0000955.1	chr1D	268212198	268214447	5.85	37206.1	340
AsNAC15	AVESA.00001b.r1.1Dg0001058.1	chr1D	278195630	278199534	4.48	45536.8	405
AsNAC16	AVESA.00001b.r1.1Dg0001082.1	chr1D	281724000	281726141	8.83	33282.7	304
AsNAC17	AVESA.00001b.r1.1Dg0002946.1	chr1D	437796458	437807088	5.02	95728.3	854
AsNAC18	AVESA.00001b.r1.1Dg0003355.1	chr1D	466277711	466279060	6.71	35167.7	317
AsNAC19	AVESA.00001b.r1.1Dg0003356.1	chr1D	466342621	466344121	7.06	38463.5	349
AsNAC20	AVESA.00001b.r1.1Dg0003531.1	chr1D	476790013	476796045	5.04	43091.2	393
AsNAC21	AVESA.00001b.r1.2Ag0001265.1	chr2A	328628515	328630560	6.92	37568.4	346
AsNAC22	AVESA.00001b.r1.2Ag0001334.1	chr2A	336395245	336396379	8.88	24068.6	215
AsNAC23	AVESA.00001b.r1.2Ag0001343.1	chr2A	337232261	337236987	6.15	42218.8	380
AsNAC24	AVESA.00001b.r1.2Ag0001346.1	chr2A	337396594	337400903	4.9	43030.2	386
AsNAC25	AVESA.00001b.r1.2Ag0001491.1	chr2A	349479900	349481341	6.52	44709.4	404
AsNAC26	AVESA.00001b.r1.2Cg0002059.1	chr2C	485480737	485489307	8.84	25061.2	223
AsNAC27	AVESA.00001b.r1.2Cg0002234.1	chr2C	504502043	504504371	6.54	30567.5	269
AsNAC28	AVESA.00001b.r1.2Dg0000174.1	chr2D	23574351	23579051	4.81	48153	428
AsNAC29	AVESA.00001b.r1.2Dg0000952.1	chr2D	88885738	88887740	4.69	45602.2	411
AsNAC30	AVESA.00001b.r1.2Dg0001201.1	chr2D	128067532	128069567	6.92	37628.5	347
AsNAC31	AVESA.00001b.r1.2Dg0001267.1	chr2D	135134397	135140561	6.45	54121.4	490
AsNAC32	AVESA.00001b.r1.2Dg0001269.1	chr2D	135206239	135212370	6.58	55359.7	502
AsNAC33	AVESA.00001b.r1.2Dg0001429.1	chr2D	145736296	145737680	6.28	44859.5	403
AsNAC34	AVESA.00001b.r1.2Dg0001553.1	chr2D	154016118	154020452	6.44	38282	333
AsNAC35	AVESA.00001b.r1.2Dg0002022.1	chr2D	183531121	183540120	9.44	117710	1075
AsNAC36	AVESA.00001b.r1.2Dg0003051.1	chr2D	432803996	432805083	5.51	31157.3	273
AsNAC37	AVESA.00001b.r1.3Ag0000839.1	chr3A	77302030	77307085	6.86	48959.7	437
AsNAC38	AVESA.00001b.r1.3Ag0001818.1	chr3A	378366379	378370184	8.83	36840.2	338
AsNAC39	AVESA.00001b.r1.3Ag0001847.1	chr3A	381573511	381575703	9.43	66131.3	618
AsNAC40	AVESA.00001b.r1.3Cg0000652.1	chr3C	67988356	67998982	4.62	34176.1	311
AsNAC41	AVESA.00001b.r1.3Cg0001684.1	chr3C	455232355	455237066	5.73	46805.3	429
AsNAC42	AVESA.00001b.r1.3Cg0001869.1	chr3C	494127437	494132549	6.88	48719.4	435
AsNAC43	AVESA.00001b.r1.3Cg0001995.1	chr3C	517397552	517401598	8.96	36004.3	333
AsNAC44	AVESA.00001b.r1.3Cg0002021.1	chr3C	521446414	521448764	9.5	65687.9	620
AsNAC45	AVESA.00001b.r1.3Cg0002533.1	chr3C	594520583	594522315	6.01	35611.2	318
AsNAC46	AVESA.00001b.r1.3Cg0002856.1	chr3C	624062256	624063920	5.48	27138.2	247
AsNAC47	AVESA.00001b.r1.3Cg0002972.1	chr3C	633819599	633821939	8.6	32656.3	396
AsNAC48	AVESA.00001b.r1.3Cg0002996.1	chr3C	634940155	634942381	9.03	44947.2	415
AsNAC49	AVESA.00001b.r1.3Dg0000293.1	chr3D	28540569	28545578	7	49044.8	437
AsNAC50	AVESA.00001b.r1.3Dg0001363.1	chr3D	329367919	329372000	8.83	35970.3	332
AsNAC51	AVESA.00001b.r1.3Dg0001387.1	chr3D	331612661	331615005	9.37	66055.2	618
AsNAC52	AVESA.00001b.r1.3Dg0001878.1	chr3D	378065823	378067550	6.11	36156.6	321
AsNAC53	AVESA.00001b.r1.4Ag0000722.1	chr4A	213955976	213958175	5.66	38421	350
AsNAC54	AVESA.00001b.r1.4Ag0001628.1	chr4A	293218026	293221260	6.67	38816.6	350
AsNAC55	AVESA.00001b.r1.4Ag0001629.1	chr4A	293236906	293238743	6.41	39357.1	350
AsNAC56	AVESA.00001b.r1.4Ag0001846.1	chr4A	309646889	309648633	6.62	35455	320
AsNAC57	AVESA.00001b.r1.4Ag0002377.1	chr4A	348388319	348389794	6.31	34993.6	315
AsNAC58	AVESA.00001b.r1.4Ag0002422.1	chr4A	351207780	351215264	5.37	40308.9	362
AsNAC59	AVESA.00001b.r1.4Ag0002472.1	chr4A	354168139	354177481	5.66	74774.3	675
AsNAC60	AVESA.00001b.r1.4Ag0002661.1	chr4A	370884200	370885911	6.11	36372.8	324
AsNAC61	AVESA.00001b.r1.4Ag0002966.1	chr4A	403279911	403281608	5.49	27250.4	249
AsNAC62	AVESA.00001b.r1.4Ag0003079.1	chr4A	410163370	410165773	8.7	32473	295
AsNAC63	AVESA.00001b.r1.4Ag0003097.1	chr4A	411464885	411467058	8.9	45136.5	417
AsNAC64	AVESA.00001b.r1.4Ag0003296.1	chr4A	427868002	427869231	9.68	25459.1	238
AsNAC65	AVESA.00001b.r1.4Cg0000292.1	chr4C	23775954	23778035	7.7	39001.9	360
AsNAC66	AVESA.00001b.r1.4Cg0000298.1	chr4C	24215925	24217641	5.6	38939.3	352
AsNAC67	AVESA.00001b.r1.4Cg0000835.1	chr4C	65031817	65037296	4.91	43282.3	396
AsNAC68	AVESA.00001b.r1.4Cg0000967.1	chr4C	74210698	74222156	5.38	40376	362
AsNAC69	AVESA.00001b.r1.4Cg0001019.1	chr4C	77197156	77202271	8.9	102231	905
AsNAC70	AVESA.00001b.r1.4Cg0001559.1	chr4C	141466750	141475106	8.55	52575.9	482
AsNAC71	AVESA.00001b.r1.4Cg0001828.1	chr4C	196628050	196631257	9.34	42516.5	384
AsNAC72	AVESA.00001b.r1.4Cg0001839.1	chr4C	200145143	200147371	6.76	43566.4	405
AsNAC73	AVESA.00001b.r1.4Cg0002986.1	chr4C	592125785	592130759	9.07	48124.1	439
AsNAC74	AVESA.00001b.r1.4Cg0002988.1	chr4C	593546699	593548456	5.63	39022.8	352
AsNAC75	AVESA.00001b.r1.4Cg0003549.1	chr4C	699133797	699141088	4.97	92647.8	828
AsNAC76	AVESA.00001b.r1.4Dg0001028.1	chr4D	247751252	247753515	5.54	38351	349
AsNAC77	AVESA.00001b.r1.4Dg0001277.1	chr4D	274720851	274724309	6.61	33129.7	296
AsNAC78	AVESA.00001b.r1.4Dg0001935.1	chr4D	319523346	319527286	6.47	39697.5	356
AsNAC79	AVESA.00001b.r1.4Dg0001936.1	chr4D	319542376	319544307	6.27	39165	347
AsNAC80	AVESA.00001b.r1.4Dg0002165.1	chr4D	333849386	333851142	6.62	35326.9	319
AsNAC81	AVESA.00001b.r1.4Dg0002550.1	chr4D	359235851	359237575	5.35	27292.4	249
AsNAC82	AVESA.00001b.r1.4Dg0002653.1	chr4D	364937098	364939520	8.65	32592.2	296
AsNAC83	AVESA.00001b.r1.4Dg0002671.1	chr4D	365770169	365772316	8.97	45000.4	415
AsNAC84	AVESA.00001b.r1.4Dg0002863.1	chr4D	379777638	379778907	8.84	25290.7	237
AsNAC85	AVESA.00001b.r1.5Ag0000138.1	chr5A	10682152	10692043	5.06	97176.9	868
AsNAC86	AVESA.00001b.r1.5Ag0000631.1	chr5A	54318640	54320301	5.51	38906.6	351
AsNAC87	AVESA.00001b.r1.5Ag0000635.1	chr5A	54900794	54902667	9.08	38156.8	350
AsNAC88	AVESA.00001b.r1.5Ag0000975.1	chr5A	103383269	103388211	8.99	33785.6	308
AsNAC89	AVESA.00001b.r1.5Ag0001844.1	chr5A	339549045	339550997	4.87	46014.2	417
AsNAC90	AVESA.00001b.r1.5Ag0001845.1	chr5A	339557964	339559537	5.9	38816.4	349
AsNAC91	AVESA.00001b.r1.5Ag0001911.1	chr5A	348260945	348270010	9.9	65822.1	602
AsNAC92	AVESA.00001b.r1.5Ag0002373.1	chr5A	415005625	415009031	6.11	44386.8	393
AsNAC93	AVESA.00001b.r1.5Ag0002725.1	chr5A	447516000	447529931	5.45	222299	2054
AsNAC94	AVESA.00001b.r1.5Ag0002748.1	chr5A	448611132	448613610	9.01	39522.6	358
AsNAC95	AVESA.00001b.r1.5Ag0002818.1	chr5A	455379097	455380497	10.17	27601.1	254
AsNAC96	AVESA.00001b.r1.5Cg0000166.1	chr5C	33084612	33087626	9.89	26540.1	246
AsNAC97	AVESA.00001b.r1.5Cg0000331.1	chr5C	65392109	65397574	4.71	68999.7	627
AsNAC98	AVESA.00001b.r1.5Cg0001256.1	chr5C	334567075	334568473	9.24	26815	244
AsNAC99	AVESA.00001b.r1.5Cg0001400.1	chr5C	366802231	366804112	4.93	45476.6	418
AsNAC100	AVESA.00001b.r1.5Cg0001401.1	chr5C	367232275	367233996	6.32	38446.1	346
AsNAC101	AVESA.00001b.r1.5Cg0001487.1	chr5C	385481007	385482208	9.83	28949.7	264
AsNAC102	AVESA.00001b.r1.5Cg0002382.1	chr5C	535351503	535354911	4.54	75624.9	692
AsNAC103	AVESA.00001b.r1.5Cg0002457.1	chr5C	542712431	542713285	10.19	22781.7	207
AsNAC104	AVESA.00001b.r1.5Cg0002458.1	chr5C	542811801	542813128	9.85	25573	235
AsNAC105	AVESA.00001b.r1.5Cg0003212.1	chr5C	603816615	603822576	5.2	95857.2	885
AsNAC106	AVESA.00001b.r1.5Cg0003236.1	chr5C	605493381	605496409	6.65	43330.3	402
AsNAC107	AVESA.00001b.r1.5Cg0003296.1	chr5C	609875586	609878376	6.35	39481.2	341
AsNAC108	AVESA.00001b.r1.5Cg0003315.1	chr5C	611094194	611096962	5.26	64101.2	582
AsNAC109	AVESA.00001b.r1.5Dg0000251.1	chr5D	22958904	22960820	9.08	38313	351
AsNAC110	AVESA.00001b.r1.5Dg0000253.1	chr5D	23203594	23205266	5.51	38922.6	351
AsNAC111	AVESA.00001b.r1.5Dg0000407.1	chr5D	44441569	44443929	9.16	56686	518
AsNAC112	AVESA.00001b.r1.5Dg0001313.1	chr5D	281119948	281127147	8.49	166700	1509
AsNAC113	AVESA.00001b.r1.5Dg0001446.1	chr5D	305370943	305372902	4.82	46243.4	419
AsNAC114	AVESA.00001b.r1.5Dg0001447.1	chr5D	305381183	305382972	5.9	38944.5	351
AsNAC115	AVESA.00001b.r1.5Dg0001505.1	chr5D	315223364	315224515	9.41	29936.8	272
AsNAC116	AVESA.00001b.r1.5Dg0002282.1	chr5D	400921298	400924010	6.17	33884.6	307
AsNAC117	AVESA.00001b.r1.5Dg0002290.1	chr5D	401589891	401593590	4.55	76142.5	696
AsNAC118	AVESA.00001b.r1.5Dg0002312.1	chr5D	402831690	402834302	9.01	39516.5	358
AsNAC119	AVESA.00001b.r1.5Dg0002367.1	chr5D	406994784	406996406	9.95	24672.7	224
AsNAC120	AVESA.00001b.r1.5Dg0002368.1	chr5D	407044958	407046236	9.83	27500.9	255
AsNAC121	AVESA.00001b.r1.5Dg0002959.1	chr5D	454709525	454711162	5.77	39060.2	351
AsNAC122	AVESA.00001b.r1.5Dg0002965.1	chr5D	455128195	455130328	6.59	39131.8	361
AsNAC123	AVESA.00001b.r1.6Ag0000044.1	chr6A	3437790	3439370	4.68	45487.9	412
AsNAC124	AVESA.00001b.r1.6Ag0001454.1	chr6A	291801017	291806087	5.27	43487.5	388
AsNAC125	AVESA.00001b.r1.6Ag0001505.1	chr6A	294639858	294641791	6.18	36830.5	338
AsNAC126	AVESA.00001b.r1.6Ag0001917.1	chr6A	327253899	327256635	6.62	33905.8	306
AsNAC127	AVESA.00001b.r1.6Ag0002032.1	chr6A	333339705	333343490	4.58	71858	658
AsNAC128	AVESA.00001b.r1.6Ag0002780.1	chr6A	411295379	411297106	5.6	38918.2	352
AsNAC129	AVESA.00001b.r1.6Ag0002786.1	chr6A	411778194	411780760	7.25	39256.1	363
AsNAC130	AVESA.00001b.r1.6Ag0002788.1	chr6A	411882544	411884498	6.69	38903.6	359
AsNAC131	AVESA.00001b.r1.6Cg0000047.1	chr6C	4174118	4175208	8.99	32489.8	294
AsNAC132	AVESA.00001b.r1.6Cg0000278.1	chr6C	23496486	23500478	8.53	34204.9	307
AsNAC133	AVESA.00001b.r1.6Cg0000949.1	chr6C	100003617	100005825	6.62	34606.6	310
AsNAC134	AVESA.00001b.r1.6Cg0001086.1	chr6C	109411244	109415227	4.49	72115.3	663
AsNAC135	AVESA.00001b.r1.6Cg0001725.1	chr6C	173649983	173652838	4.65	46157.5	417
AsNAC136	AVESA.00001b.r1.6Cg0003426.1	chr6C	615906517	615910161	5.26	43742	393
AsNAC137	AVESA.00001b.r1.6Cg0003490.1	chr6C	625422884	625425030	6.18	37221.8	341
AsNAC138	AVESA.00001b.r1.6Dg0000553.1	chr6D	168780038	168788782	9.8	82318.9	733
AsNAC139	AVESA.00001b.r1.6Dg0000994.1	chr6D	235716199	235719700	6.59	39980.8	351
AsNAC140	AVESA.00001b.r1.6Dg0001204.1	chr6D	252807325	252816612	5.39	43348.4	387
AsNAC141	AVESA.00001b.r1.6Dg0001257.1	chr6D	256403437	256405449	6.13	37763.5	345
AsNAC142	AVESA.00001b.r1.6Dg0001649.1	chr6D	287645015	287647629	6.73	33782.8	305
AsNAC143	AVESA.00001b.r1.6Dg0001774.1	chr6D	293916535	293920377	4.63	67363.3	616
AsNAC144	AVESA.00001b.r1.7Ag0000530.1	chr7A	48834123	48837548	6.35	39033.7	337
AsNAC145	AVESA.00001b.r1.7Ag0000556.1	chr7A	50106678	50109606	5.31	59535.8	549
AsNAC146	AVESA.00001b.r1.7Ag0000673.1	chr7A	59265116	59268365	6.52	43665.6	407
AsNAC147	AVESA.00001b.r1.7Ag0001242.1	chr7A	106142972	106146766	4.76	48144.1	428
AsNAC148	AVESA.00001b.r1.7Ag0001605.1	chr7A	144808276	144811849	9.6	26780.4	246
AsNAC149	AVESA.00001b.r1.7Ag0001751.1	chr7A	162180115	162184521	4.65	68743.3	625
AsNAC150	AVESA.00001b.r1.7Ag0002261.1	chr7A	362414543	362417872	8.5	32221.6	286
AsNAC151	AVESA.00001b.r1.7Ag0002346.1	chr7A	394261524	394265806	4.78	85942.2	778
AsNAC152	AVESA.00001b.r1.7Ag0002617.1	chr7A	450612548	450614915	6.6	43038.9	400
AsNAC153	AVESA.00001b.r1.7Ag0002811.1	chr7A	484067972	484069892	6.34	41727.1	373
AsNAC154	AVESA.00001b.r1.7Ag0002864.1	chr7A	490375831	490383834	8.12	52844.3	485
AsNAC155	AVESA.00001b.r1.7Cg0000356.1	chr7C	29033203	29035321	6.62	35124.7	317
AsNAC156	AVESA.00001b.r1.7Cg0000580.1	chr7C	44592567	44594438	6.72	39183.1	346
AsNAC157	AVESA.00001b.r1.7Cg0001548.1	chr7C	151937000	151939426	5.42	38317.9	348
AsNAC158	AVESA.00001b.r1.7Cg0002319.1	chr7C	387178941	387181861	6.96	32116.3	285
AsNAC159	AVESA.00001b.r1.7Cg0002397.1	chr7C	410882240	410886526	4.83	85309.6	771
AsNAC160	AVESA.00001b.r1.7Cg0002823.1	chr7C	535508203	535517262	9.08	33970.8	311
AsNAC161	AVESA.00001b.r1.7Dg0000266.1	chr7D	23233087	23238144	4.75	47917.9	326
AsNAC162	AVESA.00001b.r1.7Dg0000596.1	chr7D	58604524	58607745	9.85	26690.3	245
AsNAC163	AVESA.00001b.r1.7Dg0000706.1	chr7D	70852872	70857667	4.65	68550.1	624
AsNAC164	AVESA.00001b.r1.7Dg0001349.1	chr7D	295905852	295910124	4.79	85955.3	778
AsNAC165	AVESA.00001b.r1.7Dg0001626.1	chr7D	351660572	351665292	6.6	43022.9	400
AsNAC166	AVESA.00001b.r1.7Dg0001635.1	chr7D	352860088	352863513	9.34	42998.1	388
AsNAC167	AVESA.00001b.r1.7Dg0001685.1	chr7D	359900653	359902883	6.07	34437.1	314
AsNAC168	AVESA.00001b.r1.7Dg0001902.1	chr7D	393315996	393326996	7.5	123794	1131
AsNAC169	AVESA.00001b.r1.7Dg0002387.1	chr7D	445900700	445905064	9.64	57317.9	534
AsNAC170	AVESA.00001b.r1.7Dg0002412.1	chr7D	447347686	447353741	8.53	39936.4	365
AsNAC171	AVESA.00001b.r1.7Dg0002698.1	chr7D	468186790	468187913	9.21	32398.8	295
AsNAC172	AVESA.00001b.r1.7Dg0002773.1	chr7D	474902941	474908035	9.63	66081	608
AsNAC173	AVESA.00001b.r1.7Dg0003074.1	chr7D	496379745	496381027	9.21	32681.1	298
AsNAC174	AVESA.00001b.r1.7Dg0003379.1	chr7D	516366045	516369067	6.59	42908.8	401
AsNAC175	AVESA.00001b.r1.7Dg0003418.1	chr7D	518510070	518516254	5.07	95643.1	886
AsNAC176	AVESA.00001b.r1.7Dg0003486.1	chr7D	523174107	523176801	5.06	63249.9	583
AsNAC177	AVESA.00001b.r1.7Dg0003515.1	chr7D	524232157	524235604	6.35	38927.6	336
