# Supplementary material for: Genome-Wide Identification of NAC Gene Family and Expression Analysis under Abiotic Stresses in Avena sativa
Source: Genes (Basel). 2023 May 29;14(6):1186. doi: 10.3390/genes14061186 (PMC10298501; doi:10.3390/genes14061186)
Supplement: Supplementary file 1 [file genes-14-01186-s001.zip › Table S2.xlsx]

## Sheet: Sheet1
	Table S2 List of primers used in qRT-PCR
Gene name	Forward primer (5'-3')	Reverse primer(5'-3')
AsNAC105	CGTCTCAGGAATGGGAATCGTATCG	TGGCAATGGTAGTCGCAGTCAAG
AsNAC34	AAGCGTCAACTCACTTGCGTCTAC	TCCTCATCGGTAGGGTGGAAACG
AsNAC102	CCACCACCAAACCCAACCCATC	TCCGTCGCTTGAGGAAGTAGAGG
AsNAC52	ATCATCAGCACAGCCGCCTTTC	GCCTTCACTACTGCCATCATCCTC
AsNAC55	GCCTTCCATCAGAATGACCATAGCC	GCTGCTGTATCGTTGACCTCCATC
AsNAC35	TACAGAGGCAGAGCGGCAAGAG	GGAGTCGTTGAGCGGGATGTTC
AsNAC33	CCGATCTGGAGGAGACCGAAGAC	GTGGAGGAAGATGAAGGCTTGATGG
AsNAC32	CCACCTCACCAGCCCAGAAATTC	TGTCAAGCCTGAGAGCGGAGAG
AsNAC30	ACCTCAACAAGTGCGAGCCATG	GCGGTCCTTGAGCACGAAGAAG
AsNAC36	GCTGGACAACGACTGGCTCATG	GACAGGAAGGAGGAGGCGTAGG
AsNAC25	CCGATCTGGAGGAGACCGAAGAC	GTCGGCGTGGATGAAGATGAAGG
AsNAC37	GCTACACCCATCCTGAGAAACTTCC	CGTCGCACTCCGTCTGTATCTTG
AsNAC38	ATTCACCGACGGCAAGCTCAAG	GCTCGCCATCCTTCTCCTCCTC
AsNAC51	AGCAAGCGACAACTCTGAAGAAGG	GGAACTGGAACGGGAGACTGGAG
AsNAC56	ACCACCACCACCACACAATTCAC	TCTGTAGTAAGCGAGCGATCCTCTC
AsNAC39	GACGGCAAGAAGACCACGAGTG	ATCCTCCTCGGTTCTCATCTTCCTC
AsNAC40	TCGTCGTCGCTGAGGCTCTATC	ACCGTCCTCCTCGTGGAAGTAATC
AsNAC31	CTCAACAGCCTCGTCGCCTAAG	GCCGCCAAGTCCTGAACAGAAG
AsNAC50	CCGATCATCACCGTCACCATCAC	GCAGGGCTGTAGAAATCCACCATG
AsNAC41	GCCAAGCCTGCCCTGATATGAAG	TGTTGCCCACCTCGTTTCCATTC
AsNAC62	TTCAAGCCTCCTCTCCCTCTACAAG	CTGCTGCTGACTGCTGACGAAG
AsNAC65	TCCTTCACTACCTCCGCAACCG	GCTGAAGAAGTACCACTCGCTGTC
AsNAC60	ATCATCAGCACAGCCGCCTTTC	GCCTTCACTACTGCCATCATCCTC
AsNAC100	CAGTAGCACTCGCCGAAGAACAG	CCAATCTGCCACAACGCCTACG
AsNAC112	TTGGCTCCGTTCGTAGGCAAATC	CTTCAGACAACACCTCAGGGCTAAC
