# Supplementary figures and images for: Genome-Wide Identification of NAC Gene Family and Expression Analysis under Abiotic Stresses in Avena sativa
Source: MDPI journal article supplement (doi:10.3390/genes14061186), 2023-05-29

## Figure S1

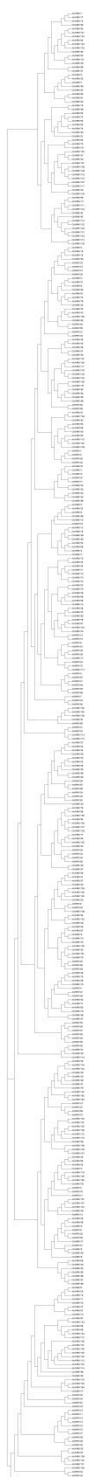

## Figure S2

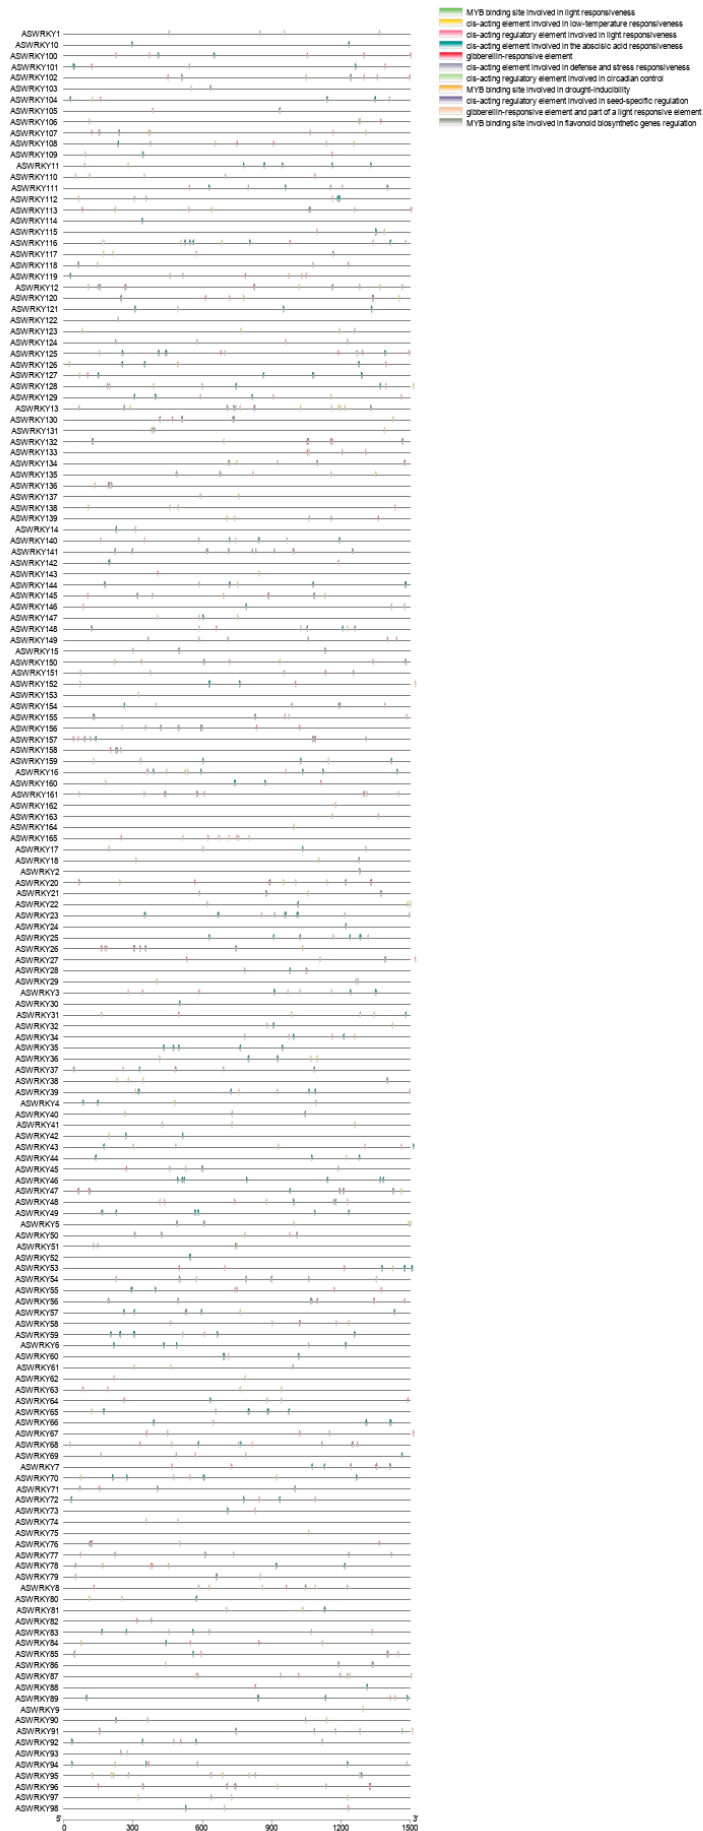

Supplement: s1 [file s1]
